# Supplementary material
Source: MDPI journal article supplement (https://www.mdpi.com/2073-8994/14/2/190)
Supplement: s1 [file s1]

Table S1. Side-to-side asymmetry of PGRF among pre-CMJ.

| Subjects | DJH30<br>CV (%) | DJH30<br>Mean | DJH30<br>SD | DJH40<br>CV (%) | DJH40<br>Mean | DJH40<br>SD | DJH50<br>CV (%) | DJH50<br>Mean | DJH50<br>SD |
|----------|-----------------|---------------|-------------|-----------------|---------------|-------------|-----------------|---------------|-------------|
| 1        | 14              | 0.42          | 0.059       | 10              | 0.36          | 0.075       | 10              | 0.75          | 0.003       |
| 2        | 11              | 0.75          | 0.082       | 12              | 0.61          | 0.048       | 11              | 0.44          | 0.003       |
| 3        | 12              | 0.25          | 0.030       | 13              | 0.32          | 0.023       | 11              | 0.21          | 0.001       |
| 4        | 14              | 0.19          | 0.027       | 11              | 0.68          | 0.046       | 11              | 0.41          | 0.003       |
| 5        | 11              | 0.06          | 0.007       | 13              | 0.10          | 0.013       | 11              | 0.12          | 0.000       |
| 6        | 12              | 0.10          | 0.012       | 14              | 0.27          | 0.076       | 13              | 0.58          | 0.002       |
| 7        | 14              | 0.24          | 0.033       | 13              | 0.45          | 0.038       | 11              | 0.35          | 0.002       |
| 8        | 10              | 0.39          | 0.039       | 12              | 0.36          | 0.092       | 14              | 0.66          | 0.002       |
| 9        | 11              | 0.32          | 0.035       | 15              | 0.29          | 0.074       | 12              | 0.62          | 0.002       |
| 10       | 13              | 0.69          | 0.090       | 12              | 0.21          | 0.059       | 11              | 0.54          | 0.001       |
| 11       | 13              | 0.29          | 0.037       | 14              | 0.40          | 0.084       | 13              | 0.65          | 0.003       |
| 12       | 13              | 0.51          | 0.066       | 10              | 0.63          | 0.029       | 11              | 0.26          | 0.002       |
| 13       | 11              | 0.13          | 0.014       | 11              | 0.20          | 0.039       | 12              | 0.33          | 0.001       |
| 14       | 13              | 0.93          | 0.121       | 13              | 0.47          | 0.130       | 14              | 0.93          | 0.004       |
| 15       | 12              | 0.24          | 0.029       | 14              | 0.45          | 0.014       | 10              | 0.14          | 0.001       |
| 16       | 12              | 0.10          | 0.012       | 10              | 0.52          | 0.004       | 11              | 0.04          | 0.000       |
| 17       | 12              | 0.06          | 0.008       | 11              | 0.15          | 0.054       | 13              | 0.41          | 0.001       |
| 18       | 12              | 0.22          | 0.027       | 11              | 0.44          | 0.041       | 13              | 0.32          | 0.001       |

NOTE: CMJ = countermovement jump; PGRF = peak ground reaction force. DJH30 = drop jump from 30cm drop height; DJH40 = Drop jump from 40cm drop height; DJH50 = drop jump from 50cm drop height. CV is coefficient of variation. The data represent the mean value. SD standard deviation

Table S2. Side-to-side asymmetry of PGRF among CMJs50.

| Subjects | DJH30<br>CV (%) | DJH30<br>Mean | DJH30<br>SD | DJH40<br>CV (%) | DJH40<br>Mean | DJH40<br>SD | DJH50<br>CV (%) | DJH50<br>Mean | DJH50<br>SD |
|----------|-----------------|---------------|-------------|-----------------|---------------|-------------|-----------------|---------------|-------------|
| 1        | 10              | 1.32          | 0.132       | 13              | 0.16          | 0.021       | 12              | 0.63          | 0.075       |
| 2        | 12              | 0.16          | 0.020       | 14              | 0.44          | 0.061       | 14              | 0.17          | 0.023       |
| 3        | 13              | 0.12          | 0.016       | 10              | 0.37          | 0.037       | 11              | 0.50          | 0.055       |
| 4        | 11              | 0.06          | 0.007       | 11              | 0.66          | 0.073       | 12              | 0.15          | 0.018       |
| 5        | 13              | 0.05          | 0.006       | 11              | 0.30          | 0.033       | 14              | 0.27          | 0.037       |
| 6        | 14              | 0.03          | 0.004       | 14              | 0.05          | 0.007       | 10              | 0.11          | 0.011       |
| 7        | 13              | 0.20          | 0.026       | 11              | 0.20          | 0.022       | 11              | 0.44          | 0.049       |
| 8        | 12              | 0.16          | 0.019       | 12              | 0.03          | 0.003       | 13              | 0.46          | 0.060       |
| 9        | 15              | 0.16          | 0.023       | 14              | 0.01          | 0.001       | 13              | 0.53          | 0.069       |
| 10       | 12              | 0.11          | 0.013       | 11              | 0.17          | 0.019       | 13              | 0.60          | 0.078       |
| 11       | 14              | 0.02          | 0.003       | 12              | 0.53          | 0.063       | 11              | 0.21          | 0.023       |
| 12       | 10              | 0.08          | 0.008       | 14              | 0.42          | 0.059       | 13              | 0.11          | 0.014       |
| 13       | 11              | 0.13          | 0.014       | 10              | 0.30          | 0.030       | 12              | 0.07          | 0.009       |
| 14       | 13              | 0.31          | 0.040       | 11              | 0.79          | 0.086       | 12              | 0.73          | 0.087       |

|           |    |      |       |    |      |       |    |      |       |
|-----------|----|------|-------|----|------|-------|----|------|-------|
| <b>15</b> | 14 | 0.09 | 0.013 | 13 | 0.51 | 0.066 | 12 | 0.22 | 0.026 |
| <b>16</b> | 10 | 0.23 | 0.023 | 13 | 0.16 | 0.021 | 12 | 0.44 | 0.053 |
| <b>17</b> | 11 | 0.15 | 0.016 | 13 | 0.18 | 0.024 | 14 | 0.00 | 0.000 |
| <b>18</b> | 11 | 0.01 | 0.001 | 11 | 0.15 | 0.017 | 10 | 0.19 | 0.019 |

NOTE: CMJ = countermovement jump; PGRF = peak ground reaction force. DJH30 = drop jump from 30cm drop height; DJH40 = Drop jump from 40cm drop height; DJH50 = drop jump from 50cm drop height. CV is coefficient of variation. The data represent the mean value. SD standard deviation

Table S3. Side-to-side asymmetry of PGRF among CMJs100.

| Subjects  | DJH30  | DJH30 | DJH30 | DJH40  | DJH40 | DJH40 | DJH50  | DJH50 | DJH50 |
|-----------|--------|-------|-------|--------|-------|-------|--------|-------|-------|
|           | CV (%) | Mean  | SD    | CV (%) | Mean  | SD    | CV (%) | Mean  | SD    |
| <b>1</b>  | 11     | 0.51  | 0.056 | 10     | 0.55  | 0.055 | 12     | 0.37  | 0.045 |
| <b>2</b>  | 11     | 0.01  | 0.001 | 12     | 0.11  | 0.013 | 14     | 0.24  | 0.034 |
| <b>3</b>  | 13     | 0.23  | 0.029 | 13     | 0.26  | 0.034 | 10     | 0.13  | 0.013 |
| <b>4</b>  | 11     | 0.18  | 0.020 | 11     | 0.18  | 0.020 | 11     | 0.14  | 0.015 |
| <b>5</b>  | 14     | 0.09  | 0.012 | 13     | 0.05  | 0.006 | 13     | 0.32  | 0.041 |
| <b>6</b>  | 12     | 0.20  | 0.024 | 14     | 0.08  | 0.011 | 10     | 0.05  | 0.005 |
| <b>7</b>  | 11     | 0.11  | 0.012 | 13     | 0.09  | 0.011 | 11     | 0.23  | 0.026 |
| <b>8</b>  | 13     | 0.01  | 0.001 | 12     | 0.46  | 0.056 | 12     | 0.05  | 0.006 |
| <b>9</b>  | 11     | 0.11  | 0.012 | 15     | 0.21  | 0.032 | 12     | 0.06  | 0.008 |
| <b>10</b> | 12     | 0.82  | 0.098 | 12     | 0.40  | 0.048 | 12     | 0.47  | 0.057 |
| <b>11</b> | 14     | 0.79  | 0.110 | 14     | 0.45  | 0.064 | 13     | 0.30  | 0.039 |
| <b>12</b> | 10     | 0.00  | 0.000 | 10     | 0.29  | 0.029 | 11     | 0.67  | 0.074 |
| <b>13</b> | 11     | 0.58  | 0.064 | 11     | 1.43  | 0.158 | 12     | 1.29  | 0.155 |
| <b>14</b> | 13     | 0.41  | 0.054 | 13     | 0.09  | 0.011 | 14     | 0.40  | 0.056 |
| <b>15</b> | 12     | 0.05  | 0.005 | 14     | 0.37  | 0.051 | 10     | 0.03  | 0.003 |
| <b>16</b> | 12     | 0.11  | 0.013 | 10     | 0.15  | 0.015 | 11     | 0.72  | 0.079 |
| <b>17</b> | 12     | 0.61  | 0.073 | 11     | 0.16  | 0.018 | 13     | 0.15  | 0.020 |
| <b>18</b> | 12     | 0.05  | 0.006 | 11     | 0.05  | 0.005 | 12     | 0.01  | 0.001 |

NOTE: CMJ = countermovement jump; PGRF = peak ground reaction force. DJH30 = drop jump from 30cm drop height; DJH40 = Drop jump from 40cm drop height; DJH50 = drop jump from 50cm drop height. CV is coefficient of variation. The data represent the mean value. SD standard deviation

Table S4. Side-to-side asymmetry of PGRF among CMJs150.

| Subjects | DJH30  | DJH30 | DJH30 | DJH40  | DJH40 | DJH40 | DJH50  | DJH50 | DJH50 |
|----------|--------|-------|-------|--------|-------|-------|--------|-------|-------|
|          | CV (%) | Mean  | SD    | CV (%) | Mean  | SD    | CV (%) | Mean  | SD    |
| <b>1</b> | 12     | 0.34  | 0.041 | 12     | 0.38  | 0.046 | 11     | 0.54  | 0.060 |
| <b>2</b> | 12     | 0.41  | 0.049 | 15     | 0.89  | 0.133 | 12     | 1.01  | 0.121 |
| <b>3</b> | 12     | 0.22  | 0.026 | 12     | 0.33  | 0.040 | 14     | 0.42  | 0.059 |
| <b>4</b> | 13     | 0.15  | 0.019 | 14     | 0.21  | 0.030 | 10     | 0.34  | 0.034 |
| <b>5</b> | 11     | 0.10  | 0.010 | 13     | 0.07  | 0.010 | 11     | 0.29  | 0.032 |

|    |    |      |       |    |      |       |    |      |       |
|----|----|------|-------|----|------|-------|----|------|-------|
| 6  | 12 | 0.05 | 0.006 | 14 | 0.12 | 0.017 | 10 | 0.27 | 0.027 |
| 7  | 11 | 0.33 | 0.036 | 13 | 0.16 | 0.020 | 11 | 0.09 | 0.010 |
| 8  | 13 | 0.10 | 0.013 | 12 | 0.13 | 0.015 | 12 | 1.00 | 0.120 |
| 9  | 11 | 0.04 | 0.005 | 15 | 0.04 | 0.006 | 12 | 0.21 | 0.026 |
| 10 | 12 | 0.10 | 0.012 | 12 | 0.24 | 0.029 | 12 | 0.39 | 0.046 |
| 11 | 14 | 0.56 | 0.078 | 14 | 0.22 | 0.031 | 13 | 0.27 | 0.036 |
| 12 | 10 | 0.23 | 0.023 | 10 | 0.06 | 0.006 | 11 | 0.49 | 0.054 |
| 13 | 11 | 0.43 | 0.047 | 11 | 0.52 | 0.057 | 12 | 0.41 | 0.050 |
| 14 | 13 | 0.55 | 0.071 | 13 | 0.45 | 0.059 | 14 | 0.49 | 0.069 |
| 15 | 12 | 0.39 | 0.047 | 14 | 0.22 | 0.030 | 10 | 0.42 | 0.042 |
| 16 | 12 | 0.18 | 0.021 | 10 | 0.13 | 0.013 | 11 | 0.32 | 0.035 |
| 17 | 12 | 0.13 | 0.015 | 11 | 0.80 | 0.088 | 13 | 1.29 | 0.167 |
| 18 | 12 | 0.42 | 0.051 | 11 | 1.36 | 0.150 | 12 | 1.55 | 0.186 |

NOTE: CMJ = countermovement jump; PGRF = peak ground reaction force. DJH30 = drop jump from 30cm drop height; DJH40 = Drop jump from 40cm drop height; DJH50 = drop jump from 50cm drop height. CV is coefficient of variation. The data represent the mean value. SD standard deviation

Table S5. Side-to-side asymmetry of PGRF among CMJs200.

| Subjects | DJH30  | DJH30 | DJH30 | DJH40  | DJH40 | DJH40 | DJH50  | DJH50 | DJH50 |
|----------|--------|-------|-------|--------|-------|-------|--------|-------|-------|
|          | CV (%) | Mean  | SD    | CV (%) | Mean  | SD    | CV (%) | Mean  | SD    |
| 1        | 10     | 0.18  | 0.018 | 13     | 0.47  | 0.061 | 12     | 0.27  | 0.032 |
| 2        | 13     | 0.37  | 0.048 | 11     | 0.26  | 0.028 | 12     | 0.02  | 0.003 |
| 3        | 14     | 0.10  | 0.014 | 13     | 0.06  | 0.008 | 12     | 0.00  | 0.000 |
| 4        | 10     | 0.16  | 0.016 | 13     | 0.02  | 0.002 | 12     | 0.31  | 0.038 |
| 5        | 11     | 0.28  | 0.031 | 13     | 0.21  | 0.027 | 14     | 0.48  | 0.067 |
| 6        | 11     | 0.29  | 0.032 | 11     | 0.07  | 0.007 | 10     | 0.03  | 0.003 |
| 7        | 13     | 0.05  | 0.006 | 11     | 0.32  | 0.036 | 11     | 0.58  | 0.064 |
| 8        | 12     | 0.57  | 0.068 | 12     | 0.48  | 0.058 | 13     | 0.86  | 0.111 |
| 9        | 15     | 0.57  | 0.086 | 14     | 0.80  | 0.112 | 13     | 0.75  | 0.098 |
| 10       | 12     | 0.19  | 0.023 | 11     | 0.12  | 0.014 | 13     | 0.59  | 0.077 |
| 11       | 14     | 0.18  | 0.025 | 12     | 0.34  | 0.040 | 11     | 0.56  | 0.062 |
| 12       | 10     | 0.17  | 0.017 | 14     | 0.39  | 0.054 | 13     | 0.41  | 0.053 |
| 13       | 11     | 0.13  | 0.015 | 10     | 0.33  | 0.033 | 12     | 0.95  | 0.115 |
| 14       | 13     | 0.03  | 0.004 | 11     | 0.14  | 0.015 | 12     | 1.02  | 0.122 |
| 15       | 14     | 0.24  | 0.034 | 13     | 0.19  | 0.024 | 12     | 0.54  | 0.064 |
| 16       | 10     | 0.13  | 0.013 | 13     | 0.16  | 0.021 | 12     | 0.68  | 0.081 |
| 17       | 15     | 0.07  | 0.011 | 14     | 0.59  | 0.082 | 13     | 0.80  | 0.104 |
| 18       | 12     | 0.16  | 0.019 | 11     | 0.76  | 0.084 | 13     | 0.84  | 0.109 |

NOTE: CMJ = countermovement jump; PGRF = peak ground reaction force. DJH30 = drop jump from 30cm drop height; DJH40 = Drop jump from 40cm drop height; DJH50 = drop jump from 50cm drop height. CV is coefficient of variation. The data represent the mean value. SD standard deviation

Table S6. The PGRF among countermovement jumps of left foot.

| Variables            | CMJ                   | DJH30     | DJH40     | DJH50     | <i>p</i> | <i>ES</i><br>(40/30) | <i>ES</i><br>(50/30) | <i>ES</i><br>(50/40) |
|----------------------|-----------------------|-----------|-----------|-----------|----------|----------------------|----------------------|----------------------|
| <b>PGRF<br/>(BW)</b> | Pre-CMJ               | 1.71±0.44 | 1.81±0.50 | 2.01±0.55 | 0.100    | /                    | /                    | /                    |
|                      | CMJs50                | 1.68±0.36 | 1.76±0.34 | 1.95±0.45 | 0.120    | /                    | /                    | /                    |
|                      | CMJs100 <sup>‡§</sup> | 1.66±0.40 | 1.72±0.33 | 1.89±0.36 | 0.003*   | 0.30                 | 0.69                 | 0.62                 |
|                      | CMJs150 <sup>‡§</sup> | 1.67±0.31 | 1.71±0.38 | 1.89±0.36 | 0.009*   | 0.17                 | 0.87                 | 0.62                 |
|                      | CMJs200 <sup>‡§</sup> | 1.69±0.42 | 1.80±0.38 | 1.97±0.42 | 0.003*   | 0.43                 | 0.83                 | 0.66                 |

**NOTE:** CMJ = countermovement jump; PGRF = peak ground reaction force. DJH30 = drop jump from 30cm drop height; DJH40 = Drop jump from 40cm drop height; DJH50 = drop jump from 50cm drop height. “\*”Indicates a significant difference between three drop heights; “‡”indicates a significant difference from DJH30 and DJH50; “§” indicates a significant difference from DJH40 and DJH50 ( $p < 0.05$ ).

Table S7. The PGRF among countermovement jumps of right foot.

| Variables            | CMJ                   | DJH30     | DJH40     | DJH50     | <i>p</i> | <i>ES</i><br>(40/30) | <i>ES</i><br>(50/30) | <i>ES</i><br>(50/40) |
|----------------------|-----------------------|-----------|-----------|-----------|----------|----------------------|----------------------|----------------------|
| <b>PGRF<br/>(BW)</b> | Pre-CMJ               | 1.79±0.40 | 1.84±0.32 | 2.09±0.36 | 0.200    | /                    | /                    | /                    |
|                      | CMJs50                | 1.76±0.36 | 1.79±0.41 | 1.98±0.38 | 0.170    | /                    | /                    | /                    |
|                      | CMJs100 <sup>‡§</sup> | 1.89±0.36 | 1.90±0.40 | 2.04±0.46 | 0.022*   | 0.02                 | 0.62                 | 0.50                 |
|                      | CMJs150 <sup>‡§</sup> | 1.80±0.31 | 1.93±0.36 | 2.13±0.42 | 0.001*   | 0.59                 | 1.00                 | 0.77                 |
|                      | CMJs200 <sup>‡§</sup> | 1.73±0.30 | 1.84±0.35 | 2.06±0.31 | 0.001*   | 0.61                 | 1.59                 | 1.19                 |

**NOTE:** CMJ = countermovement jump; PGRF = peak ground reaction force. DJH30 = drop jump from 30cm drop height; DJH40 = Drop jump from 40cm drop height; DJH50 = drop jump from 50cm drop height. “\*”Indicates a significant difference between three drop heights; “‡”indicates a significant difference from DJH30 and DJH50; “§” indicates a significant difference from DJH40 and DJH50 ( $p < 0.05$ ).

Table S8. The Side-to-side asymmetry of PGRF among countermovement jumps

| Variables            | CMJ                   | DJH30     | DJH40     | DJH50     | <i>p</i> | <i>ES</i><br>(40/30) | <i>ES</i><br>(50/30) | <i>ES</i><br>(50/40) |
|----------------------|-----------------------|-----------|-----------|-----------|----------|----------------------|----------------------|----------------------|
| <b>PGRF<br/>(BW)</b> | Pre-CMJ               | 0.33±0.25 | 0.39±0.17 | 0.43±0.24 | 0.251    | /                    | /                    | /                    |
|                      | CMJs50                | 0.19±0.29 | 0.30±0.22 | 0.32±0.22 | 0.183    | /                    | /                    | /                    |
|                      | CMJs100 <sup>‡§</sup> | 0.13±0.11 | 0.27±0.19 | 0.45±0.23 | 0.001*   | 0.84                 | 1.55                 | 0.74                 |
|                      | CMJs150 <sup>‡§</sup> | 0.26±0.21 | 0.35±0.20 | 0.54±0.27 | 0.001*   | 0.53                 | 0.92                 | 0.72                 |
|                      | CMJs200 <sup>‡§</sup> | 0.22±0.20 | 0.31±0.19 | 0.55±0.30 | 0.001*   | 0.77                 | 1.36                 | 0.89                 |

**NOTE:** CMJ = countermovement jump; PGRF = peak ground reaction force. DJH30 = drop jump from 30cm drop height; DJH40 = Drop jump from 40cm drop height; DJH50 = drop jump from 50cm drop height. “\*”Indicates a significant difference between three drop heights; “‡”indicates a significant difference from DJH30 and DJH50; “§” indicates a significant difference from DJH40 and DJH50 ( $p < 0.05$ ).

Table S9. Muscles simulation activation (%) during countermovement jump squat phase.

| Variables | Muscles            | DJH30       | DJH40       | DJH50        | <i>p</i> | <i>ES</i><br>(40/30) | <i>ES</i><br>(50/30) | <i>ES</i><br>(50/40) |
|-----------|--------------------|-------------|-------------|--------------|----------|----------------------|----------------------|----------------------|
| pre-CMJ   | RTA                | 18.97±7.51  | 19.38±5.21  | 20.93±6.00   | 0.347    | /                    | /                    | /                    |
|           | LTA                | 19.60±5.78  | 19.70±5.90  | 19.99±5.79   | 0.930    | /                    | /                    | /                    |
|           | RSOL               | 18.12±5.72  | 18.57±3.79  | 20.12±4.85   | 0.298    | /                    | /                    | /                    |
|           | LSOL               | 18.02±4.40  | 18.55±4.41  | 20.02±6.15   | 0.243    | /                    | /                    | /                    |
|           | RQF                | 12.20±9.39  | 13.12±6.79  | 14.43±10.07  | 0.545    | /                    | /                    | /                    |
|           | LQF                | 13.77±11.00 | 17.07±13.80 | 17.24±15.83  | 0.448    | /                    | /                    | /                    |
|           | RGA                | 23.08±7.40  | 23.72±6.47  | 24.83±8.31   | 0.514    | /                    | /                    | /                    |
|           | LGA                | 22.29±6.42  | 23.59±5.46  | 24.86±5.59   | 0.173    | /                    | /                    | /                    |
|           | RBF                | 7.70±6.70   | 8.40±5.80   | 8.70±8.00    | 0.778    | /                    | /                    | /                    |
|           | LBF                | 6.50±4.80   | 7.10±8.10   | 8.20±6.90    | 0.720    | /                    | /                    | /                    |
| CMJs50    | RTA <sup>‡§</sup>  | 18.87±4.36  | 20.58±5.11  | 22.35±5.17   | 0.000*   | 0.58                 | 1.12                 | 0.95                 |
|           | LTA <sup>‡§</sup>  | 17.58±7.12  | 20.02±6.68  | 23.12±6.57   | 0.001*   | 0.58                 | 1.12                 | 0.95                 |
|           | RSOL <sup>‡§</sup> | 17.06±6.68  | 19.97±6.48  | 22.53±6.09   | 0.000*   | 0.69                 | 1.08                 | 0.77                 |
|           | LSOL <sup>‡§</sup> | 18.99±4.77  | 20.32±5.76  | 22.52±5.65   | 0.001*   | 0.36                 | 1.03                 | 0.67                 |
|           | RQF <sup>‡§</sup>  | 8.63±9.29   | 13.82±12.04 | 23.18±16.17  | 0.001*   | 0.71                 | 1.39                 | 1.12                 |
|           | LQF <sup>‡§</sup>  | 8.52±6.91   | 17.04±14.47 | 26.48±16.08  | 0.001*   | 0.63                 | 1.70                 | 1.21                 |
|           | RGA <sup>‡§</sup>  | 20.79±8.36  | 23.96±7.04  | 26.92±7.06   | 0.001*   | 0.55                 | 1.07                 | 0.82                 |
|           | LGA <sup>‡§</sup>  | 23.53±6.50  | 25.06±6.43  | 27.44±6.83   | 0.001*   | 0.39                 | 0.96                 | 0.84                 |
|           | RBF <sup>‡§</sup>  | 6.90±5.50   | 10.80±6.50  | 14.00±6.20   | 0.002*   | 0.51                 | 0.89                 | 0.77                 |
|           | LBF <sup>‡§</sup>  | 6.30±4.10   | 6.70±4.20   | 18.20 ±23.10 | 0.016*   | 0.09                 | 0.57                 | 0.50                 |
| CMJs100   | RTA <sup>‡§</sup>  | 20.47±6.65  | 20.36±5.67  | 16.68±7.56   | 0.003*   | 0.03                 | 0.75                 | 0.69                 |
|           | LTA <sup>‡§</sup>  | 22.31±8.09  | 20.52±7.69  | 18.47±9.96   | 0.030*   | 0.32                 | 0.73                 | 0.29                 |
|           | RSOL <sup>‡§</sup> | 22.21±5.77  | 18.22±5.31  | 17.04±5.68   | 0.001*   | 1.02                 | 1.42                 | 0.51                 |
|           | LSOL <sup>‡§</sup> | 21.25±5.90  | 18.96 ±5.44 | 17.68±5.41   | 0.001*   | 0.83                 | 0.91                 | 0.53                 |
|           | RQF <sup>‡§</sup>  | 18.45±13.24 | 11.38±11.28 | 6.18±6.52    | 0.001*   | 0.66                 | 1.06                 | 0.63                 |
|           | LQF <sup>‡§</sup>  | 22.72±15.24 | 14.31±11.77 | 9.37±67.05   | 0.001*   | 1.29                 | 1.04                 | 0.55                 |
|           | RGA <sup>‡§</sup>  | 26.35±5.97  | 22.05±5.96  | 20.66±6.58   | 0.001*   | 1.04                 | 1.37                 | 0.51                 |
|           | LGA <sup>‡§</sup>  | 26.20±7.10  | 22.76±6.57  | 20.82±6.05   | 0.001*   | 1.00                 | 1.34                 | 0.86                 |
|           | RBF <sup>‡§</sup>  | 10.90±5.60  | 7.70±4.20   | 4.60±3.30    | 0.001*   | 0.92                 | 1.00                 | 0.65                 |
|           | LBF <sup>‡§</sup>  | 16.50±16.60 | 10.00±10.00 | 5.80±5.10    | 0.007*   | 0.60                 | 0.71                 | 0.59                 |
| CMJs150   | RTA <sup>‡§</sup>  | 19.27±5.22  | 17.05±5.67  | 14.40±5.24   | 0.001*   | 0.66                 | 0.92                 | 0.68                 |
|           | LTA <sup>‡§</sup>  | 19.68±4.91  | 18.82±6.74  | 17.09±6.39   | 0.038*   | 0.18                 | 0.57                 | 0.56                 |
|           | RSOL <sup>‡§</sup> | 20.14±4.99  | 17.96±4.70  | 16.16 ±5.28  | 0.001*   | 0.82                 | 0.97                 | 0.75                 |
|           | LSOL <sup>‡§</sup> | 21.96±5.21  | 19.85±5.42  | 18.11±5.58   | 0.001*   | 0.50                 | 0.88                 | 0.56                 |
|           | RQF <sup>‡§</sup>  | 19.25±11.84 | 13.22±10.82 | 7.83±9.44    | 0.001*   | 0.85                 | 1.23                 | 0.83                 |
|           | LQF <sup>‡§</sup>  | 32.70±22.20 | 19.78±16.08 | 13.20±11.50  | 0.001*   | 0.91                 | 1.15                 | 0.65                 |
|           | RGA <sup>‡§</sup>  | 24.61±5.85  | 21.80±5.46  | 19.22 ±6.12  | 0.003*   | 1.10                 | 1.30                 | 1.19                 |
|           | LGA <sup>‡§</sup>  | 25.21±6.51  | 22.41±6.11  | 20.20±5.80   | 0.001*   | 0.64                 | 0.93                 | 0.76                 |
|           | RBF <sup>‡§</sup>  | 10.30±5.90  | 6.80±3.10   | 5.10±2.60    | 0.001*   | 0.77                 | 0.90                 | 0.61                 |

|                |                    |             |             |             |        |      |      |      |
|----------------|--------------------|-------------|-------------|-------------|--------|------|------|------|
| <b>CMJs200</b> | LBF <sup>‡§</sup>  | 11.10±12.90 | 7.00±7.20   | 3.60±2.90   | 0.017* | 0.63 | 0.62 | 0.55 |
|                | RTA <sup>‡§</sup>  | 19.48±5.37  | 16.57±5.24  | 14.21±4.65  | 0.001* | 0.66 | 0.92 | 0.71 |
|                | LTA <sup>‡§</sup>  | 19.61±5.51  | 17.89±6.70  | 12.12±9.06  | 0.011* | 0.40 | 0.70 | 0.56 |
|                | RSOL <sup>‡§</sup> | 19.16±4.67  | 16.38±5.58  | 14.48±4.38  | 0.001* | 0.59 | 0.96 | 0.53 |
|                | LSOL <sup>‡§</sup> | 18.31±5.05  | 16.80±5.07  | 15.39±4.86  | 0.005* | 0.41 | 0.82 | 0.78 |
|                | RQF <sup>‡§</sup>  | 21.27±15.50 | 16.66±13.82 | 11.58±12.41 | 0.002* | 0.53 | 0.81 | 0.81 |
|                | LQF <sup>‡§</sup>  | 26.51±19.88 | 17.02±13.28 | 11.57±13.37 | 0.001* | 0.71 | 1.01 | 0.66 |
|                | RGA <sup>‡§</sup>  | 23.49±6.69  | 21.55±6.13  | 19.13±5.73  | 0.033* | 0.32 | 0.56 | 0.54 |
|                | LGA <sup>‡§</sup>  | 23.38±4.98  | 20.78±6.54  | 18.62±6.52  | 0.001* | 0.55 | 1.23 | 0.80 |
|                | RBF <sup>‡§</sup>  | 11.50±7.10  | 8.20±4.40   | 5.10±4.40   | 0.001* | 0.60 | 0.88 | 0.76 |
|                | LBF <sup>‡§</sup>  | 14.20±16.50 | 9.10±8.10   | 3.20±3.80   | 0.009* | 0.53 | 0.69 | 0.74 |

**NOTE:** CMJ=countermovement jump; DJH30 = Drop jump from 30 cm drop heights; DJH40 = Drop jump from 40 cm drop heights; DJH50 = Drop jump from 50 cm drop heights. RTA=Right tibial anterior; LTA=Left tibial anterior; RSOL=Right soleus; LSOL= Left soleus; RQF=Right Quadratus Femoris; LQF=Left Quadratus Femoris; RGA= Right Gastrocnemius; LGA= Left Gastrocnemius; RBF= Right Biceps Femoris; LBF= Left Biceps Femoris. One-way repeated measures ANOVA of 5 CMJ (CMJs50, MJs100, CMJs150, CMJs200 and CMJs250). The post-hoc test was performed by LSD among DJH30, DJH40, DJH50. “\*”Indicates a significant difference between three drop heights; “‡”indicates a significant difference from DJH30 and DJH50; “§” indicates a significant difference from DJH40 and DJH50 (p < 0.05).

Table S10. Muscles simulation activation (%) during countermovement jump push-off phase.

| Variables      | Muscles            | DJH30        | DJH40        | DJH50        | <i>p</i> | <i>ES</i><br>(40/30) | <i>ES</i><br>(50/30) | <i>ES</i><br>(50/40) |
|----------------|--------------------|--------------|--------------|--------------|----------|----------------------|----------------------|----------------------|
| <b>pre-CMJ</b> | RTA                | 34.30±10.56  | 34.46±6.53   | 37.55±9.02   | 0.177    | /                    | /                    | /                    |
|                | LTA                | 34.17±8.04   | 35.57±7.42   | 36.44±6.77   | 0.241    | /                    | /                    | /                    |
|                | RSOL               | 36.18±10.80  | 37.89±8.43   | 38.96±9.80   | 0.352    | /                    | /                    | /                    |
|                | LSOL               | 37.14±8.48   | 38.31±8.68   | 38.42±8.70   | 0.476    | /                    | /                    | /                    |
|                | RQF                | 1.98 ±5.83   | 2.65±5.30    | 6.79±12.29   | 0.063    | /                    | /                    | /                    |
|                | LQF                | 8.82±11.41   | 9.44 ±12.54  | 12.65 ±14.07 | 0.192    | /                    | /                    | /                    |
|                | RGA                | 39.93±7.89   | 40.51±9.59   | 43.27±9.85   | 0.180    | /                    | /                    | /                    |
|                | LGA                | 39.44±8.31   | 40.03±9.71   | 41.03 ±8.98  | 0.716    | /                    | /                    | /                    |
|                | RBF                | 29.70±22.20  | 19.20±15.20  | 16.10±16.90  | 0.108    | /                    | /                    | /                    |
|                | LBF                | 23.90±17.80  | 21.00±15.10  | 16.60±22.20  | 0.260    | /                    | /                    | /                    |
| <b>CMJs50</b>  | RTA <sup>‡§</sup>  | 37.44±12.73  | 40.64 ±12.21 | 43.46 ±11.58 | 0.001*   | 0.59                 | 0.95                 | 0.63                 |
|                | LTA <sup>‡§</sup>  | 34.80±7.86   | 36.54±7.55   | 39.74±7.82   | 0.001*   | 0.39                 | 0.88                 | 0.76                 |
|                | RSOL <sup>‡§</sup> | 38.00±12.99  | 41.66±12.13  | 44.45±11.47  | 0.001*   | 0.62                 | 1.03                 | 0.58                 |
|                | LSOL <sup>‡§</sup> | 34.04±5.87   | 36.05±7.34   | 40.07±7.56   | 0.001*   | 0.45                 | 1.16                 | 1.04                 |
|                | RQF <sup>‡§</sup>  | 2.71±6.29    | 4.97±7.68    | 10.35±13.53  | 0.007*   | 0.34                 | 0.66                 | 0.52                 |
|                | LQF <sup>‡§</sup>  | 7.25 ±11.75  | 11.67 ±13.41 | 17.19±18.08  | 0.001*   | 0.42                 | 0.87                 | 0.60                 |
|                | RGA <sup>‡§</sup>  | 46.22 ±12.35 | 47.97±11.60  | 51.10±10.95  | 0.005*   | 0.48                 | 0.78                 | 0.51                 |
|                | LGA <sup>‡§</sup>  | 43.78±9.37   | 45.66±9.48   | 48.96±8.01   | 0.001*   | 0.32                 | 0.86                 | 0.74                 |
|                | RBF <sup>‡§</sup>  | 42.30 ±35.30 | 27.00±19.20  | 15.00±13.20  | 0.010*   | 0.64                 | 0.67                 | 0.55                 |

|                |                    |              |              |              |        |      |      |      |
|----------------|--------------------|--------------|--------------|--------------|--------|------|------|------|
| <b>CMJs100</b> | LBF <sup>‡§</sup>  | 34.60±28.00  | 30.80±28.30  | 20.70±23.10  | 0.001* | 0.29 | 0.89 | 0.87 |
|                | RTA <sup>‡§</sup>  | 40.29±9.26   | 37.26±8.67   | 34.83±8.47   | 0.001* | 0.76 | 1.22 | 1.14 |
|                | LTA <sup>‡§</sup>  | 38.63±7.61   | 36.68±8.59   | 34.87±8.16   | 0.006* | 0.37 | 0.78 | 0.54 |
|                | RSOL <sup>‡§</sup> | 40.66 ±8.88  | 38.13 ±9.01  | 36.28 ±9.19  | 0.003* | 0.54 | 0.80 | 0.68 |
|                | LSOL <sup>‡§</sup> | 39.30±10.74  | 36.65±8.53   | 34.55±8.16   | 0.001* | 0.60 | 0.87 | 0.74 |
|                | RQF <sup>‡§</sup>  | 12.29 ±12.27 | 5.79±7.55    | 1.73±2.58    | 0.001* | 0.55 | 0.93 | 0.57 |
|                | LQF <sup>‡§</sup>  | 19.01±21.98  | 13.63±18.53  | 8.77±14.69   | 0.004* | 0.76 | 0.76 | 0.65 |
|                | RGA <sup>‡§</sup>  | 49.29±10.64  | 47.16±9.71   | 43.81±10.39  | 0.002* | 0.37 | 1.05 | 0.98 |
|                | LGA <sup>‡§</sup>  | 46.91±7.45   | 44.49±7.26   | 43.10±7.56   | 0.002* | 0.56 | 0.92 | 0.67 |
|                | RBF <sup>‡§</sup>  | 12.70±11.90  | 24.20 ±17.90 | 44.70±28.10  | 0.000* | 0.63 | 1.17 | 0.88 |
| <b>CMJs150</b> | LBF <sup>‡§</sup>  | 18.30±18.10  | 26.50±23.50  | 43.20±28.70  | 0.001* | 0.37 | 1.07 | 0.76 |
|                | RTA <sup>‡§</sup>  | 38.52±8.01   | 35.85±7.28   | 33.72±6.74   | 0.001* | 0.74 | 0.85 | 0.63 |
|                | LTA <sup>‡§</sup>  | 37.58±7.06   | 34.74±5.96   | 33.65±6.35   | 0.001* | 0.78 | 1.18 | 0.87 |
|                | RSOL <sup>‡§</sup> | 39.40±7.73   | 37.02±7.94   | 34.47±7.05   | 0.001* | 0.60 | 0.96 | 0.61 |
|                | LSOL <sup>‡§</sup> | 39.27±8.89   | 35.00±7.84   | 31.90±9.33   | 0.001* | 1.04 | 1.35 | 0.83 |
|                | RQF <sup>‡§</sup>  | 10.07±14.73  | 5.04±11.53   | 2.48 ±6.75   | 0.006* | 0.58 | 0.73 | 0.51 |
|                | LQF <sup>‡§</sup>  | 20.75±23.20  | 12.05±16.53  | 8.51±13.64   | 0.001* | 0.76 | 0.98 | 0.59 |
|                | RGA <sup>‡§</sup>  | 48.97±11.46  | 45.64±11.82  | 43.13±11.11  | 0.001* | 0.88 | 1.01 | 0.69 |
|                | LGA <sup>‡§</sup>  | 48.33±9.39   | 45.49±9.55   | 42.37±9.71   | 0.001* | 0.64 | 1.17 | 1.09 |
|                | RBF <sup>‡§</sup>  | 17.50±12.60  | 28.00±21.50  | 45.00±28.20  | 0.001* | 0.48 | 0.93 | 0.85 |
| <b>CMJs200</b> | LBF <sup>‡§</sup>  | 12.20±13.50  | 20.60±18.70  | 38.60 ±24.00 | 0.001* | 0.34 | 0.93 | 0.93 |
|                | RTA <sup>‡§</sup>  | 35.59±6.82   | 31.58±6.20   | 28.30±5.29   | 0.001* | 1.11 | 1.60 | 0.80 |
|                | LTA <sup>‡§</sup>  | 35.53±7.48   | 31.91±7.54   | 28.81±8.11   | 0.001* | 0.84 | 1.37 | 0.39 |
|                | RSOL <sup>‡§</sup> | 37.48±7.62   | 34.35±6.73   | 30.43 ±5.91  | 0.001* | 0.55 | 1.26 | 0.95 |
|                | LSOL <sup>‡§</sup> | 36.97±8.99   | 33.59±7.23   | 29.95±7.73   | 0.001* | 0.73 | 1.37 | 1.09 |
|                | RQF <sup>‡§</sup>  | 11.62±13.12  | 6.52 ±12.20  | 1.06±3.13    | 0.001* | 0.50 | 0.88 | 0.51 |
|                | LQF <sup>‡§</sup>  | 20.56±21.64  | 10.39±13.76  | 2.98±5.71    | 0.002* | 1.06 | 0.87 | 0.62 |
|                | RGA <sup>‡§</sup>  | 49.56±10.58  | 45.06±9.21   | 41.38 ±11.54 | 0.001* | 0.77 | 1.29 | 0.77 |
|                | LGA <sup>‡§</sup>  | 48.57±8.72   | 45.46±8.83   | 42.63±8.49   | 0.001* | 0.84 | 1.23 | 0.65 |
|                | RBF <sup>‡§</sup>  | 12.80±12.90  | 23.60 ±17.30 | 33.40 ±20.10 | 0.001* | 0.67 | 1.09 | 0.78 |
| <b>CMJs250</b> | LBF <sup>‡§</sup>  | 16.40±18.00  | 21.70±23.50  | 36.50±27.90  | 0.001* | 0.76 | 0.32 | 0.99 |

**NOTE:** CMJ=countermovement jump; DJH30 = Drop jump from 30 cm drop heights; DJH40 = Drop jump from 40 cm drop heights; DJH50 = Drop jump from 50 cm drop heights. RTA=Right tibial anterior; LTA=Left tibial anterior; RSOL=Right soleus; LSOL= Left soleus; RQF=Right Quadratus Femoris; LQF=Left Quadratus Femoris; RGA= Right Gastrocnemius; LGA= Left Gastrocnemius; RBF= Right Biceps Femoris; LBF= Left Biceps Femoris. One-way repeated measures ANOVA of 5 CMJ (CMJs50, MJs100, CMJs150, CMJs200 and CMJs250). The post-hoc test was performed by LSD among DJH30, DJH40, DJH50. "\*"Indicates a significant difference between three drop heights; "‡"indicates a significant difference from DJH30 and DJH50; "§" indicates a significant difference from DJH40 and DJH50 ( $p < 0.05$ ).

Table S11. Muscles simulation activation (%) during countermovement jump landing phase.

| Variables | Muscles            | DJH30       | DJH40       | DJH50        | <i>p</i> | <i>ES</i><br>(40/30) | <i>ES</i><br>(50/30) | <i>ES</i><br>(50/40) |
|-----------|--------------------|-------------|-------------|--------------|----------|----------------------|----------------------|----------------------|
| pre-CMJ   | RTA                | 23.29±6.49  | 24.05±5.39  | 24.48±6.39   | 0.730    | /                    | /                    | /                    |
|           | LTA                | 22.79±5.72  | 24.40±6.66  | 25.45±6.30   | 0.069    | /                    | /                    | /                    |
|           | RSOL               | 23.95±6.66  | 23.99±4.59  | 25.19±6.43   | 0.567    | /                    | /                    | /                    |
|           | LSOL               | 24.42 ±5.92 | 24.63±5.22  | 26.38±7.55   | 0.162    | /                    | /                    | /                    |
|           | RQF                | 9.82±7.60   | 10.49±9.56  | 13.07±9.22   | 0.306    | /                    | /                    | /                    |
|           | LQF                | 12.54±15.70 | 13.12±11.10 | 18.57 ±13.91 | 0.197    | /                    | /                    | /                    |
|           | RGA                | 29.73±8.54  | 30.57±6.49  | 31.16±8.38   | 0.671    | /                    | /                    | /                    |
|           | LGA                | 29.66±6.72  | 29.82±7.06  | 32.06±7.38   | 0.100    | /                    | /                    | /                    |
|           | RBF                | 14.70±6.90  | 11.10±6.40  | 10.60±5.60   | 0.071    | /                    | /                    | /                    |
|           | LBF                | 14.40±9.30  | 14.10±9.50  | 10.20±8.00   | 0.260    | /                    | /                    | /                    |
| CMJs50    | RTA <sup>‡§</sup>  | 24.47±9.40  | 26.39±8.32  | 29.44±8.31   | 0.002*   | 0.37                 | 0.88                 | 1.08                 |
|           | LTA <sup>‡§</sup>  | 24.21±6.84  | 25.80±6.92  | 28.29±7.28   | 0.001*   | 0.39                 | 0.96                 | 0.63                 |
|           | RSOL <sup>‡§</sup> | 24.69±9.63  | 27.64±8.22  | 29.81±8.61   | 0.001*   | 0.60                 | 0.90                 | 0.65                 |
|           | LSOL <sup>‡§</sup> | 24.13±4.83  | 25.88±5.92  | 28.27±5.83   | 0.001*   | 0.43                 | 0.95                 | 0.61                 |
|           | RQF <sup>‡§</sup>  | 6.55±7.53   | 10.88±10.35 | 17.00±12.18  | 0.001*   | 0.67                 | 1.32                 | 1.04                 |
|           | LQF <sup>‡§</sup>  | 8.01±6.68   | 16.91±13.90 | 24.46±14.27  | 0.001*   | 0.67                 | 1.32                 | 1.04                 |
|           | RGA <sup>‡§</sup>  | 28.43±9.24  | 31.99±8.04  | 34.19±7.82   | 0.001*   | 0.58                 | 0.99                 | 0.71                 |
|           | LGA <sup>‡§</sup>  | 29.72±7.67  | 31.56±8.33  | 34.18±7.86   | 0.001*   | 0.35                 | 1.00                 | 0.61                 |
|           | RBF <sup>‡§</sup>  | 19.00±11.0  | 13.60±5.50  | 9.80±5.80    | 0.004*   | 0.61                 | 0.76                 | 0.53                 |
|           | LBF <sup>‡§</sup>  | 20.40±11.3  | 16.20±11.5  | 11.00±9.60   | 0.001*   | 0.66                 | 0.98                 | 0.59                 |
| CMJs100   | RTA <sup>‡§</sup>  | 26.08±5.91  | 22.77±4.28  | 20.66±5.23   | 0.001*   | 0.79                 | 1.29                 | 0.99                 |
|           | LTA <sup>‡§</sup>  | 26.55±6.29  | 23.67±5.07  | 22.45±4.75   | 0.001*   | 0.68                 | 1.15                 | 0.55                 |
|           | RSOL <sup>‡§</sup> | 27.47±4.93  | 24.74±3.91  | 22.88±5.22   | 0.001*   | 0.60                 | 1.02                 | 0.77                 |
|           | LSOL <sup>‡§</sup> | 27.42±5.69  | 25.19±5.35  | 23.84±5.03   | 0.001*   | 0.65                 | 0.96                 | 0.78                 |
|           | RQF <sup>‡§</sup>  | 18.59±10.98 | 11.12±10.46 | 6.67±4.79    | 0.001*   | 0.76                 | 1.21                 | 0.54                 |
|           | LQF <sup>‡§</sup>  | 20.33±14.23 | 16.68±13.82 | 9.56±7.37    | 0.004*   | 0.68                 | 0.84                 | 0.55                 |
|           | RGA <sup>‡§</sup>  | 33.39±7.03  | 29.92±6.82  | 28.16±8.07   | 0.001*   | 0.74                 | 1.05                 | 0.63                 |
|           | LGA <sup>‡§</sup>  | 33.51±6.47  | 30.25±6.47  | 28.61±5.92   | 0.001*   | 0.83                 | 1.06                 | 0.69                 |
|           | RBF <sup>‡§</sup>  | 8.10±6.20   | 14.30±6.90  | 23.70±13.10  | 0.001*   | 0.77                 | 1.28                 | 0.93                 |
|           | LBF <sup>‡§</sup>  | 8.30±8.60   | 15.30±9.70  | 21.70±12.60  | 0.001*   | 0.74                 | 1.31                 | 0.73                 |
| CMJs150   | RTA <sup>‡§</sup>  | 25.18±5.92  | 23.76±6.04  | 21.52±6.11   | 0.001*   | 0.42                 | 0.86                 | 0.73                 |
|           | LTA <sup>‡§</sup>  | 27.13±5.74  | 24.72±6.44  | 21.76±6.21   | 0.002*   | 0.54                 | 1.08                 | 0.73                 |
|           | RSOL <sup>‡§</sup> | 25.80±6.79  | 23.67±6.08  | 20.85±6.43   | 0.001*   | 0.66                 | 0.91                 | 0.90                 |
|           | LSOL <sup>‡§</sup> | 27.99±6.03  | 25.63±6.96  | 23.59±6.73   | 0.001*   | 0.54                 | 1.01                 | 0.64                 |
|           | RQF <sup>‡§</sup>  | 14.37±8.56  | 10.59±8.39  | 7.46 ±5.41   | 0.001*   | 0.46                 | 0.90                 | 0.62                 |
|           | LQF <sup>‡§</sup>  | 25.24±17.34 | 19.22±14.62 | 11.42±11.83  | 0.001*   | 0.56                 | 1.05                 | 0.66                 |
|           | RGA <sup>‡§</sup>  | 31.75±7.36  | 29.93±7.47  | 26.13±7.61   | 0.001*   | 0.41                 | 0.89                 | 0.95                 |
|           | LGA <sup>‡§</sup>  | 33.32±6.86  | 30.42±7.74  | 28.46±8.01   | 0.001*   | 0.55                 | 0.95                 | 0.55                 |
|           | RBF <sup>‡§</sup>  | 10.40±6.00  | 16.60±10.10 | 25.20±11.90  | 0.001*   | 0.62                 | 1.23                 | 1.35                 |

|                |                    |             |             |             |        |      |      |      |
|----------------|--------------------|-------------|-------------|-------------|--------|------|------|------|
| <b>CMJs200</b> | LBF <sup>‡§</sup>  | 12.00±10.50 | 15.00±9.30  | 22.20±12.00 | 0.005* | 0.26 | 0.75 | 1.02 |
|                | RTA <sup>‡§</sup>  | 25.04±5.62  | 22.59±6.31  | 19.68±5.15  | 0.001* | 0.48 | 0.83 | 0.69 |
|                | LTA <sup>‡§</sup>  | 22.76±4.56  | 20.18±4.91  | 18.14±4.71  | 0.001* | 0.63 | 1.05 | 0.78 |
|                | RSOL <sup>‡§</sup> | 26.11±6.92  | 23.22±7.79  | 19.79±4.67  | 0.001* | 0.58 | 1.21 | 0.60 |
|                | LSOL <sup>‡§</sup> | 26.39±4.86  | 22.42±5.03  | 20.30±5.79  | 0.001* | 0.95 | 1.35 | 0.57 |
|                | RQF <sup>‡§</sup>  | 15.75±12.56 | 10.19±11.32 | 6.70±8.52   | 0.001* | 0.67 | 0.92 | 0.56 |
|                | LQF <sup>‡§</sup>  | 16.77±14.38 | 12.68±9.01  | 8.13±6.54   | 0.003* | 0.41 | 0.78 | 0.57 |
|                | RGA <sup>‡§</sup>  | 29.28±7.71  | 27.01±7.12  | 22.79±5.71  | 0.003* | 0.33 | 0.81 | 0.95 |
|                | LGA <sup>‡§</sup>  | 28.05±5.85  | 25.46±6.25  | 20.76±5.88  | 0.001* | 0.43 | 1.23 | 1.13 |
|                | RBF <sup>‡§</sup>  | 10.80±8.40  | 13.00±6.80  | 19.90±9.20  | 0.001* | 0.23 | 0.88 | 0.89 |
|                | LBF <sup>‡§</sup>  | 6.70±7.10   | 13.90±11.30 | 23.50±15.10 | 0.001* | 0.82 | 1.29 | 0.91 |

**NOTE:** CMJ=countermovement jump; DJH30 = Drop jump from 30 cm drop heights; DJH40 = Drop jump from 40 cm drop heights; DJH50 = Drop jump from 50 cm drop heights. RTA=Right tibial anterior; LTA =Left tibial anterior; RSOL=Right soleus; LSOL= Left soleus; RQF=Right Quadratus Femoris; LQF=Left Quadratus Femoris; RGA= Right Gastrocnemius; LGA= Left Gastrocnemius; RBF= Right Biceps Femoris; LBF= Left Biceps Femoris. One-way repeated measures ANOVA of 5 CMJ (CMJs50, MJs100, CMJs150, CMJs200 and CMJs250). The post-hoc test was performed by LSD among DJH30, DJH40, DJH50. "\*"Indicates a significant difference between three drop heights; "‡"indicates a significant difference from DJH30 and DJH50; "§" indicates a significant difference from DJH40 and DJH50 (p < 0.05).
